# Supplementary material for: Photocatalytic degradation of ibuprofen using TiO2 sensitized by Ru(II) polyaza complexes
Source: Royal Society of Chemistry journal article supplement (doi:10.1039/c6pp00222f), 2016-09-06
Supplement: c6pp00222f1.pdf [file c6pp00222f1.pdf]

### Supplementary material

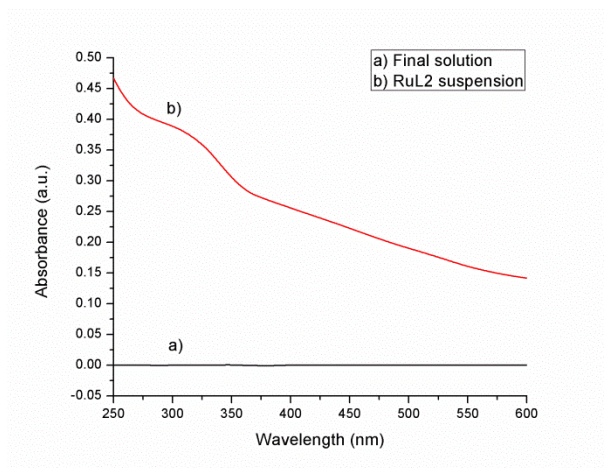

Figure SM1. Comparison of the UV-Vis spectra of: a) final solution obtained when RuL2-TiO<sub>2</sub> catalyst was vigorously stirred under visible light during 5 h and b) an aqueous suspension of RuL2 complex ( $1 \times 10^{-5}$  M).

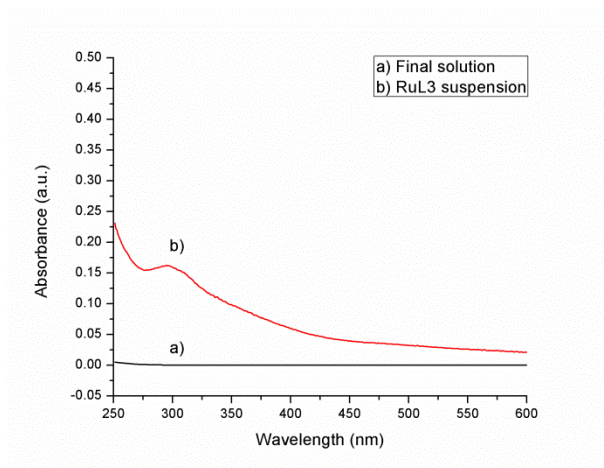

Figure SM2. Comparison of the UV-Vis spectra of: a) final solution obtained when RuL3-TiO<sub>2</sub> catalyst was vigorously stirred under visible light during 5 h and b) an aqueous suspension of RuL3 complex ( $1 \times 10^{-5}$  M).
